# Supplementary material for: Assessment of blood pressure control in adult hypertensive patients in eastern Sudan
Source: Springer Nature journal article supplement (doi:10.1186/s12872-018-0769-5), 2018-02-07
Supplement: MOESM1 [file 15445832]

**Questionnaire for the assessment of blood pressure control in adult hypertensive patients in eastern Sudan**

Serial number-----

Age-

Gender male  female

Residence rural  urban

Marital status married  -unmarried-

Education: Nil/traditional  secondary  university and above

Health insurance Yes  No

Duration of HT  Number of drugs  Number of antihypertensive

Other diseases: No  Yes

If Yes DM  Thyroid  Ischemic attach  Heart failure  Renal dis

**No      Yes**

Smoking

Alcoholic

Add salt

Drink coffee

Weight---height-

Drug adherence --Please see annex

Blood pressure, systolic- diastoli----

**Traditional medicine** No  -Yes     Using antilipids No  Yes

**Home measurement** No     Yes

**Antihypertensive:**

Calcium channel blockers (amlodipine)

Angiotensin II receptor blockers (lisinopril)

Angiotensin-converting enzyme inhibitors (losartan)

Beta-blockers (atenolol)

Diuretics (hydrochlorothiazide)

Lipids    cholesterols    -----triglycerides----    HDL        LDL
